# Supplementary material
Source: publisher site journal article supplement (https://www.kjim.org/upload/media/kjim-2021-475-suppl2.pdf)
Supplement: Supplementary file 1 [file kjim-2021-475-suppl2.pdf]

**Supplementary Table 2. MPN-SAF 10 symptoms within the last 12 months (patient reported)**

| Variable                                        | MF                 |            | PV                 |            | ET                |            | All                |            |
|-------------------------------------------------|--------------------|------------|--------------------|------------|-------------------|------------|--------------------|------------|
|                                                 | Score              | Incidence  | Score              | Incidence  | Score             | Incidence  | Score              | Incidence  |
| Fatigue or tiredness                            | 4.89 ± 2.36        | 30 (76.92) | 3.44 ± 2.41        | 13 (52.00) | 5.00 ± 2.26       | 32 (78.05) | 4.63 ± 2.39        | 75 (71.43) |
| Abdominal discomfort                            | 2.33 ± 2.17        | 8 (20.51)  | 2.50 ± 3.02        | 2 (8.00)   | 3.07 ± 2.63       | 9 (21.95)  | 2.63 ± 2.48        | 19 (18.10) |
| Night sweats                                    | 3.38 ± 2.90        | 8 (20.51)  | 3.07 ± 2.89        | 9 (36.00)  | 1.80 ± 2.94       | 5 (12.20)  | 2.84 ± 2.90        | 22 (20.95) |
| Filling up quickly when eating (early satiety)  | 3.56 ± 2.71        | 10 (25.64) | 2.67 ± 3.24        | 5 (20.00)  | 2.75 ± 3.02       | 4 (9.76)   | 3.08 ± 2.89        | 19 (18.10) |
| Bone pain (diffuse/not joint pain or arthritis) | 1.67 ± 1.95        | 4 (10.26)  | 2.00 ± 1.95        | 7 (28.00)  | 1.67 ± 1.97       | 3 (7.32)   | 1.76 ± 1.91        | 14 (13.33) |
| Inactivity                                      | 3.54 ± 2.45        | 16 (41.03) | 3.15 ± 2.61        | 8 (32.00)  | 3.77 ± 3.14       | 6 (14.63)  | 3.50 ± 2.64        | 30 (28.57) |
| Itching (pruritus)                              | 2.75 ± 2.35        | 7 (17.95)  | 4.29 ± 3.24        | 15 (60.00) | 2.70 ± 1.87       | 12 (29.27) | 3.23 ± 2.58        | 34 (32.38) |
| Unintentional weight loss                       | 3.50 ± 3.42        | 5 (12.82)  | 1.86 ± 3.76        | 0          | 1.58 ± 3.09       | 3 (7.32)   | 2.39 ± 3.38        | 8 (7.62)   |
| Problems with concentration                     | 3.83 ± 2.50        | 15 (38.46) | 2.64 ± 2.84        | 8 (32.00)  | 2.81 ± 2.40       | 7 (17.07)  | 3.24 ± 2.55        | 30 (28.57) |
| Fever                                           | 2.08 ± 2.61        | 6 (15.38)  | 1.33 ± 2.18        | 3 (12.00)  | 1.30 ± 1.95       | 3 (7.32)   | 1.61 ± 2.25        | 12 (11.43) |
| MPN-SAF TSS                                     |                    |            |                    |            |                   |            |                    |            |
| Mean ± SD                                       | 16.84 ± 14.67      |            | 14.87 ± 10.15      |            | 13.59 ± 12.14     |            | 15.18 ± 12.73      |            |
| Median (range)                                  | 11.00 (0.00–56.00) |            | 11.00 (2.00–36.00) |            | 9.00 (0.00–53.00) |            | 11.00 (0.00–56.00) |            |

Values are presented as mean ± standard deviation or number (%).

MPN-SAF, myeloproliferative neoplasm-Symptom Assessment Form; MF, myelofibrosis; PV, polycythemia vera; ET, essential thrombocythemia; TSS, Total Symptom Score; SD, standard deviation.
